# Supplementary material for: Discrimination of the Social ParasiteEctatomma parasiticumby Its Host Sibling Species (E. tuberculatum)
Source: Hindawi journal article supplement (doi:10.1155/2013/573541), 2013-01-01
Supplement: f1 [file 573541.f1.pdf]

# Supplementary Material

Demography of the 98 colonies of *Ectatomma tuberculatum* sampled in three sites of Apazapan between September 1999 and November 2011.

| Date             | Colony number | Site | Dealate queen | Alate queen | Dealate parasite | Alate parasite | Workers | Males | Cocoons | Larvae |
|------------------|---------------|------|---------------|-------------|------------------|----------------|---------|-------|---------|--------|
| September 1999   | 1             | 1    | 1             | 0           | 5                | 0              | 12      | 0     | 0       | 1      |
|                  | 2             | 1    | 0             | 0           | 1                | 0              | 51      | 0     | 0       | 0      |
|                  | 3             | 1    | 3             | 0           | 4                | 7              | 120     | 0     | 0       | 0      |
| June-July 2000   | 4             | 1    | 1             | 0           | 1                | 0              | 122     | 1     | 1       | 0      |
|                  | 8             | 1    | 1             | 0           | 0                | 0              | 217     | 6     | 125     | 13     |
|                  | 9             | 1    | 2             | 4           | 0                | 0              | 191     | 1     | 2       | 0      |
|                  | 10            | 1    | 1             | 0           | 0                | 0              | 157     | 2     | 106     | 18     |
|                  | 11            | 1    | 0             | 0           | 0                | 0              | 93      | 2     | 18      | 7      |
|                  | 12            | 1    | 3             | 0           | 5                | 2              | 34      | 0     | 0       | 0      |
|                  | 14            | 1    | 1             | 0           | 4                | 4              | 114     | 0     | 0       | 0      |
|                  | 15            | 1    | 8             | 0           | 0                | 0              | 22      | 2     | 3       | 1      |
|                  | 16            | 1    | 1             | 0           | 0                | 0              | 71      | 1     | 0       | 1      |
|                  | 17            | 1    | 0             | 0           | 1                | 2              | 15      | 18    | 11      | 1      |
|                  | 18            | 1    | 1             | 0           | 0                | 0              | 60      | 0     | 5       | 2      |
|                  | 20            | 1    | 0             | 0           | 0                | 6              | 26      | 1     | 0       | 0      |
|                  | 21            | 1    | 1             | 0           | 1                | 5              | 137     | 0     | 33      | 7      |
|                  | 22            | 1    | 1             | 0           | 0                | 3              | 163     | 6     | 6       | 6      |
|                  | 23            | 1    | 1             | 0           | 4                | 2              | 118     | 0     | 22      | 2      |
|                  | 24            | 1    | 1             | 29          | 2                | 0              | 254     | 1     | 118     | 4      |
|                  | 25            | 1    | 0             | 0           | 1                | 11             | 76      | 3     | 1       | 135    |
|                  | 26            | 1    | 1             | 0           | 0                | 0              | 180     | 1     | 71      | 7      |
|                  | 27            | 1    | 1             | 0           | 1                | 17             | 428     | 0     | 0       | 13     |
|                  | 28            | 1    | 1             | 0           | 1                | 6              | 172     | 5     | 70      | 21     |
|                  | 29            | 1    | 0             | 0           | 0                | 0              | 82      | 5     | 52      | 26     |
| March-April 2002 | 30            | 2    | 1             | 0           | 0                | 0              | 187     | 0     | 4       | 1      |

|              |    |   |   |   |   |   |     |   |    |    |
|--------------|----|---|---|---|---|---|-----|---|----|----|
|              | 31 | 2 | 0 | 0 | 0 | 0 | 243 | 0 | 2  | 1  |
|              | 32 | 2 | 1 | 0 | 0 | 0 | 99  | 0 | 3  | 2  |
|              | 33 | 2 | 1 | 0 | 0 | 0 | 197 | 0 | 1  | 1  |
|              | 34 | 1 | 1 | 0 | 0 | 0 | 358 | 0 | 6  | 6  |
|              | 35 | 1 | 0 | 0 | 0 | 0 | 117 | 0 | 0  | 0  |
|              | 36 | 1 | 2 | 0 | 0 | 0 | 127 | 0 | 9  | 9  |
|              | 37 | 1 | 1 | 0 | 0 | 0 | 130 | 0 | 5  | 2  |
|              | 38 | 1 | 1 | 0 | 0 | 0 | 215 | 0 | 46 | 38 |
|              | 39 | 1 | 1 | 0 | 0 | 0 | 243 | 0 | 0  | 0  |
|              | 40 | 1 | 1 | 0 | 0 | 0 | 191 | 0 | 36 | 36 |
|              | 41 | 1 | 1 | 0 | 0 | 0 | 101 | 0 | 27 | 18 |
|              | 42 | 1 | 1 | 0 | 0 | 0 | 92  | 0 | 10 | 10 |
|              | 43 | 1 | 1 | 0 | 0 | 0 | 205 | 0 | 1  | 1  |
|              | 44 | 1 | 1 | 0 | 0 | 0 | 106 | 0 | 5  | 1  |
|              | 46 | 1 | 3 | 0 | 0 | 0 | 64  | 0 | 7  | 6  |
|              | 47 | 1 | 0 | 0 | 0 | 0 | 178 | 0 | 20 | 13 |
|              | 48 | 2 | 0 | 1 | 0 | 0 | 55  | 0 | 0  | 0  |
|              | 50 | 2 | 1 | 0 | 0 | 0 | 146 | 0 | 0  | 0  |
|              | 51 | 2 | 1 | 0 | 0 | 0 | 119 | 0 | 0  | 0  |
|              | 52 | 3 | 2 | 0 | 0 | 0 | 179 | 0 | 8  | 3  |
|              | 53 | 3 | 1 | 0 | 0 | 0 | 51  | 0 | 19 | 7  |
|              | 54 | 3 | 4 | 0 | 0 | 0 | 225 | 0 | 13 | 9  |
|              | 55 | 3 | 1 | 0 | 0 | 0 | 99  | 0 | 0  | 0  |
|              | 56 | 3 | 2 | 0 | 0 | 0 | 63  | 0 | 1  | 1  |
|              | 57 | 1 | 2 | 0 | 0 | 0 | 66  | 0 | 0  | 0  |
|              | 58 | 1 | 1 | 0 | 0 | 0 | 210 | 0 | 67 | 34 |
|              | 59 | 1 | 1 | 0 | 0 | 0 | 253 | 0 | 3  | 2  |
|              | 60 | 3 | 1 | 0 | 0 | 0 | 186 | 0 | 31 | 22 |
|              | 61 | 1 | 1 | 0 | 0 | 0 | 200 | 0 | 5  | 0  |
|              | 62 | 1 | 1 | 0 | 0 | 0 | 260 | 0 | 89 | 59 |
|              | 63 | 1 | 4 | 0 | 0 | 0 | 117 | 0 | 2  | 1  |
| January 2009 | 65 | 2 | 0 | 0 | 0 | 0 | 214 | 0 | 0  | 6  |

|                  |     |   |    |   |   |   |     |    |    |    |
|------------------|-----|---|----|---|---|---|-----|----|----|----|
|                  | 66  | 2 | 1  | 0 | 0 | 0 | 281 | 0  | 0  | 0  |
|                  | 67  | 2 | 2  | 0 | 0 | 0 | 280 | 0  | 1  | 1  |
|                  | 69  | 2 | 5  | 0 | 0 | 0 | 73  | 0  | 0  | 2  |
|                  | 70  | 2 | 1  | 0 | 0 | 0 | 46  | 0  | 0  | 0  |
|                  | 71  | 2 | 1  | 0 | 0 | 0 | 287 | 0  | 0  | 0  |
|                  | 72  | 2 | 1  | 0 | 0 | 0 | 164 | 1  | 6  | 7  |
|                  | 74  | 2 | 2  | 0 | 0 | 0 | 85  | 1  | 0  | 0  |
|                  | 75  | 2 | 1  | 0 | 0 | 0 | 272 | 0  | 1  | 0  |
|                  | 76  | 2 | 2  | 0 | 0 | 0 | 198 | 0  | 7  | 65 |
|                  | 77  | 2 | 7  | 0 | 0 | 0 | 240 | 0  | 0  | 23 |
|                  | 78  | 2 | 1  | 0 | 0 | 0 | 114 | 0  | 0  | 0  |
|                  | 80  | 2 | 1  | 0 | 0 | 0 | 261 | 0  | 0  | 23 |
|                  | 81  | 2 | 1  | 0 | 0 | 0 | 54  | 0  | 5  | 5  |
|                  | 82  | 2 | 1  | 0 | 0 | 0 | 147 | 11 | 0  | 48 |
|                  | 84  | 1 | 2  | 0 | 0 | 0 | 333 | 0  | 0  | 58 |
|                  | 85  | 1 | 2  | 0 | 0 | 0 | 164 | 0  | 0  | 27 |
|                  | 86  | 1 | 8  | 0 | 0 | 0 | 261 | 0  | 1  | 14 |
|                  | 87  | 1 | 1  | 0 | 0 | 0 | 341 | 1  | 0  | 81 |
|                  | 88  | 1 | 1  | 0 | 0 | 0 | 163 | 0  | 0  | 38 |
|                  | 89  | 1 | 1  | 0 | 0 | 0 | 265 | 35 | 0  | 28 |
|                  | 90  | 1 | 4  | 0 | 0 | 0 | 223 | 0  | 0  | 72 |
|                  | 91  | 1 | 1  | 0 | 0 | 0 | 329 | 16 | 3  | 33 |
| September 2010 * | 92  | 2 | 0  | 0 | 0 | 0 | 61  | 0  | 0  | 0  |
|                  | 93  | 2 | 0  | 0 | 0 | 0 | 50  | 0  | 5  | 0  |
|                  | 94  | 2 | 18 | 3 | 0 | 0 | 150 | 0  | 3  | 1  |
|                  | 95  | 2 | 0  | 0 | 0 | 0 | 47  | 0  | 0  | 0  |
|                  | 96  | 2 | 1  | 0 | 0 | 0 | 64  | 0  | 0  | 0  |
|                  | 97  | 2 | 0  | 0 | 0 | 0 | 71  | 0  | 4  | 4  |
|                  | 98  | 2 | 2  | 0 | 0 | 0 | 100 | 0  | 3  | 0  |
|                  | 99  | 2 | 0  | 0 | 0 | 0 | 101 | 0  | 42 | 4  |
| November 2011    | 101 | 2 | 3  | 0 | 0 | 0 | 74  | 0  | 1  | 0  |
|                  | 102 | 2 | 1  | 0 | 0 | 0 | 235 | 0  | 0  | 0  |

|     |   |   |   |   |   |     |   |   |    |
|-----|---|---|---|---|---|-----|---|---|----|
| 104 | 2 | 2 | 0 | 0 | 0 | 249 | 0 | 0 | 0  |
| 105 | 2 | 1 | 0 | 0 | 0 | 254 | 0 | 0 | 1  |
| 106 | 1 | 1 | 0 | 0 | 0 | 383 | 0 | 4 | 3  |
| 107 | 1 | 0 | 0 | 0 | 0 | 95  | 0 | 0 | 6  |
| 108 | 1 | 0 | 0 | 0 | 0 | 95  | 0 | 0 | 0  |
| 109 | 1 | 0 | 0 | 0 | 0 | 229 | 0 | 1 | 10 |
| 110 | 3 | 2 | 0 | 0 | 0 | 94  | 0 | 0 | 0  |
| 112 | 3 | 1 | 0 | 0 | 0 | 57  | 0 | 0 | 0  |
| 113 | 3 | 0 | 0 | 0 | 0 | 23  | 0 | 0 | 0  |
| 114 | 3 | 2 | 0 | 0 | 0 | 148 | 0 | 0 | 0  |

---

\* Data from Pérez-Lachaud et al. [36]
